# Supplementary material
Source: HighWire-hosted journal article supplement (https://erj.ersjournals.com/content/60/1/2101780)

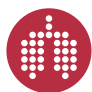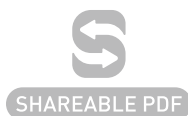

# *Mycobacterium tuberculosis*-specific CD4 T-cell scoring discriminates tuberculosis infection from disease

Andrej Mantei<sup>1,10</sup>, Tim Meyer<sup>1,10</sup>, Mariana Schürmann<sup>2</sup>, Christiane Beßler<sup>3</sup>, Harald Bias<sup>3</sup>, David Krieger<sup>4</sup>, Torsten Bauer<sup>4</sup>, Petra Bacher<sup>5,6</sup>, Johannes Helmuth<sup>7</sup>, Hans-Dieter Volk<sup>1,8,9</sup>, Dirk Schürmann<sup>2,11</sup>, Alexander Scheffold<sup>5,11</sup> and Christian Meisel<sup>1,8,9,11</sup>

<sup>1</sup>Dept of Immunology, Labor Berlin – Charité Vivantes GmbH, Berlin, Germany. <sup>2</sup>Dept of Infectious Diseases and Respiratory Medicine, Charité – Universitätsmedizin Berlin, Berlin, Germany. <sup>3</sup>Occupational Medicine Centre, Charité – Universitätsmedizin Berlin, Berlin, Germany. <sup>4</sup>Dept of Pneumology, Lungenklinik Heckeshorn, Helios Klinikum Emil von Behring, Berlin, Germany. <sup>5</sup>Institute of Immunology, Universitätsklinikum Schleswig-Holstein, Kiel, Germany. <sup>6</sup>Institute of Clinical Molecular Biology, Christian-Albrechts Universität zu Kiel, Kiel, Germany. <sup>7</sup>Dept of Human Genetics, Labor Berlin – Charité Vivantes GmbH, Berlin, Germany. <sup>8</sup>BIH Center for Regenerative Therapies (BCRT), Charité – Universitätsmedizin Berlin, Berlin, Germany. <sup>9</sup>Institute of Medical Immunology, Charité – Universitätsmedizin Berlin, Berlin, Germany. <sup>10</sup>A. Mantei and T. Meyer contributed equally to this work. <sup>11</sup>D. Schürmann, A. Scheffold and C. Meisel contributed equally to this work.

Corresponding author: Christian Meisel ([christian.meisel@laborberlin.com](mailto:christian.meisel@laborberlin.com))

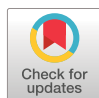

Shareable abstract (@ERSpublications)

In a prospective study, a scoring system based on analysis of the activation state of tuberculosis (TB)-specific CD4<sup>+</sup> T-cells was developed that allows reliable discrimination of TB infection and TB disease with high sensitivity and specificity <https://bit.ly/3EFG4KX>

**Cite this article as:** Mantei A, Meyer T, Schürmann M, et al. *Mycobacterium tuberculosis*-specific CD4 T-cell scoring discriminates tuberculosis infection from disease. *Eur Respir J* 2022; 60: 2101780 [DOI: 10.1183/13993003.01780-2021].

This single-page version can be shared freely online.

Copyright ©The authors 2022.

This version is distributed under the terms of the Creative Commons Attribution Non-Commercial Licence 4.0. For commercial reproduction rights and permissions contact [permissions@ersnet.org](mailto:permissions@ersnet.org)

Received: 23 June 2021

Accepted: 26 Nov 2021

## Abstract

**Background** Rapid and reliable diagnostic work-up of tuberculosis (TB) remains a major healthcare goal. In particular, discrimination of TB infection from TB disease with currently available diagnostic tools is challenging and time consuming. This study aimed at establishing a standardised blood-based assay that rapidly and reliably discriminates TB infection from TB disease based on multiparameter analysis of TB antigen-reactive CD4<sup>+</sup> T-cells acting as sensors for TB stage-specific immune status.

**Methods** 157 HIV-negative subjects with suspected TB infection or TB disease were recruited from local tertiary care hospitals in Berlin (Germany). Peripheral blood mononuclear cells were analysed for CD4<sup>+</sup> T-cells reactive to the *Mycobacterium tuberculosis* antigens purified protein derivative and early secretory antigenic target 6 kDa/culture filtrate protein 10. The activation state of TB antigen-reactive T-cells, identified by surface expression of CD154, was evaluated according to the expression profile of proliferation marker Ki-67 and activation markers CD38 and HLA-DR. Using data from 81 subjects with clinically confirmed TB infection (n=34) or culture-proven pulmonary or extrapulmonary TB disease (n=47), 12 parameters were derived from the expression profile and integrated into a scoring system.

**Results** Using the scoring system, our assay (TB-Flow Assay) allowed reliable discrimination of TB infection from both pulmonary and extrapulmonary TB disease with high sensitivity (90.9%) and specificity (93.3%) as was confirmed by Monte-Carlo cross-validation.

**Conclusion** With low time requirement, ease of sample collection, and high sensitivity and specificity both for pulmonary and extrapulmonary TB disease, we believe this novel standardised TB-Flow Assay will improve the work-up of patients with suspected TB disease, supporting rapid TB diagnosis and facilitating treatment decisions.

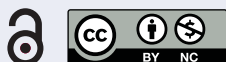

Supplement: inline-supplementary-material-2 [file inline-supplementary-material-2.pdf]
